# Supplementary material
Source: publisher site journal article supplement (https://www.dovepress.com/article/363050)

## Supplementary Material

Figure S1. Comparison of the infiltrating levels of other immune cells between the CLEC1B high and CLEC1B low groups.

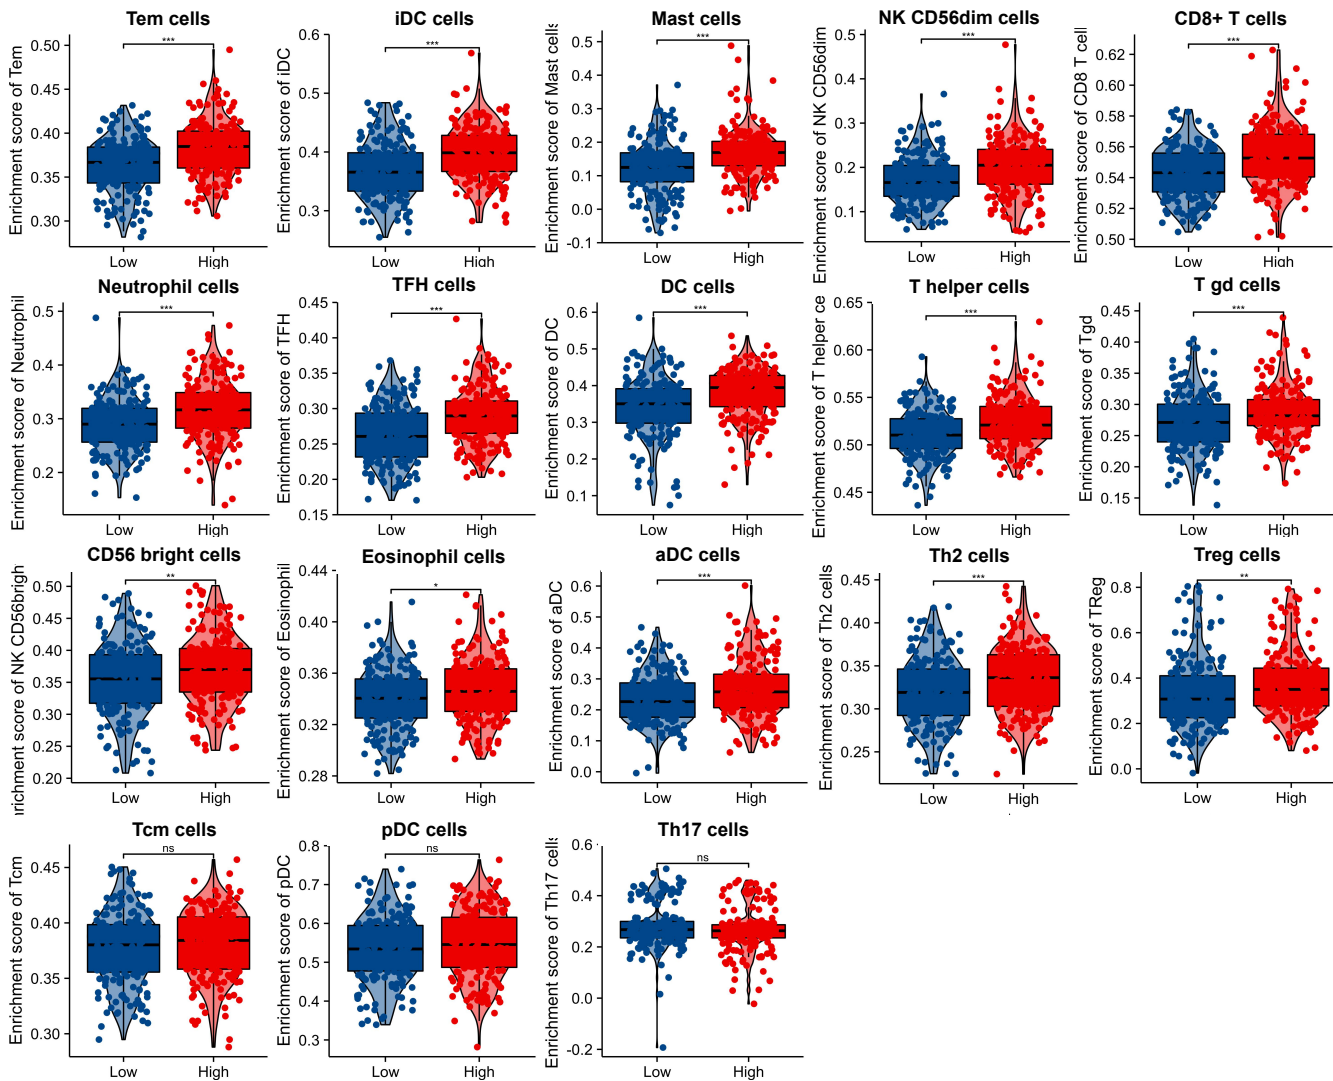

Supplement: Supplementary file 1 [file get_supplementary_file.php]
